# Supplementary material
Source: publisher site journal article supplement (https://www.dovepress.com/article/449290)
Supplement: Supplementary file 1 [file get_supplementary_file.php]

**Supplement martials**


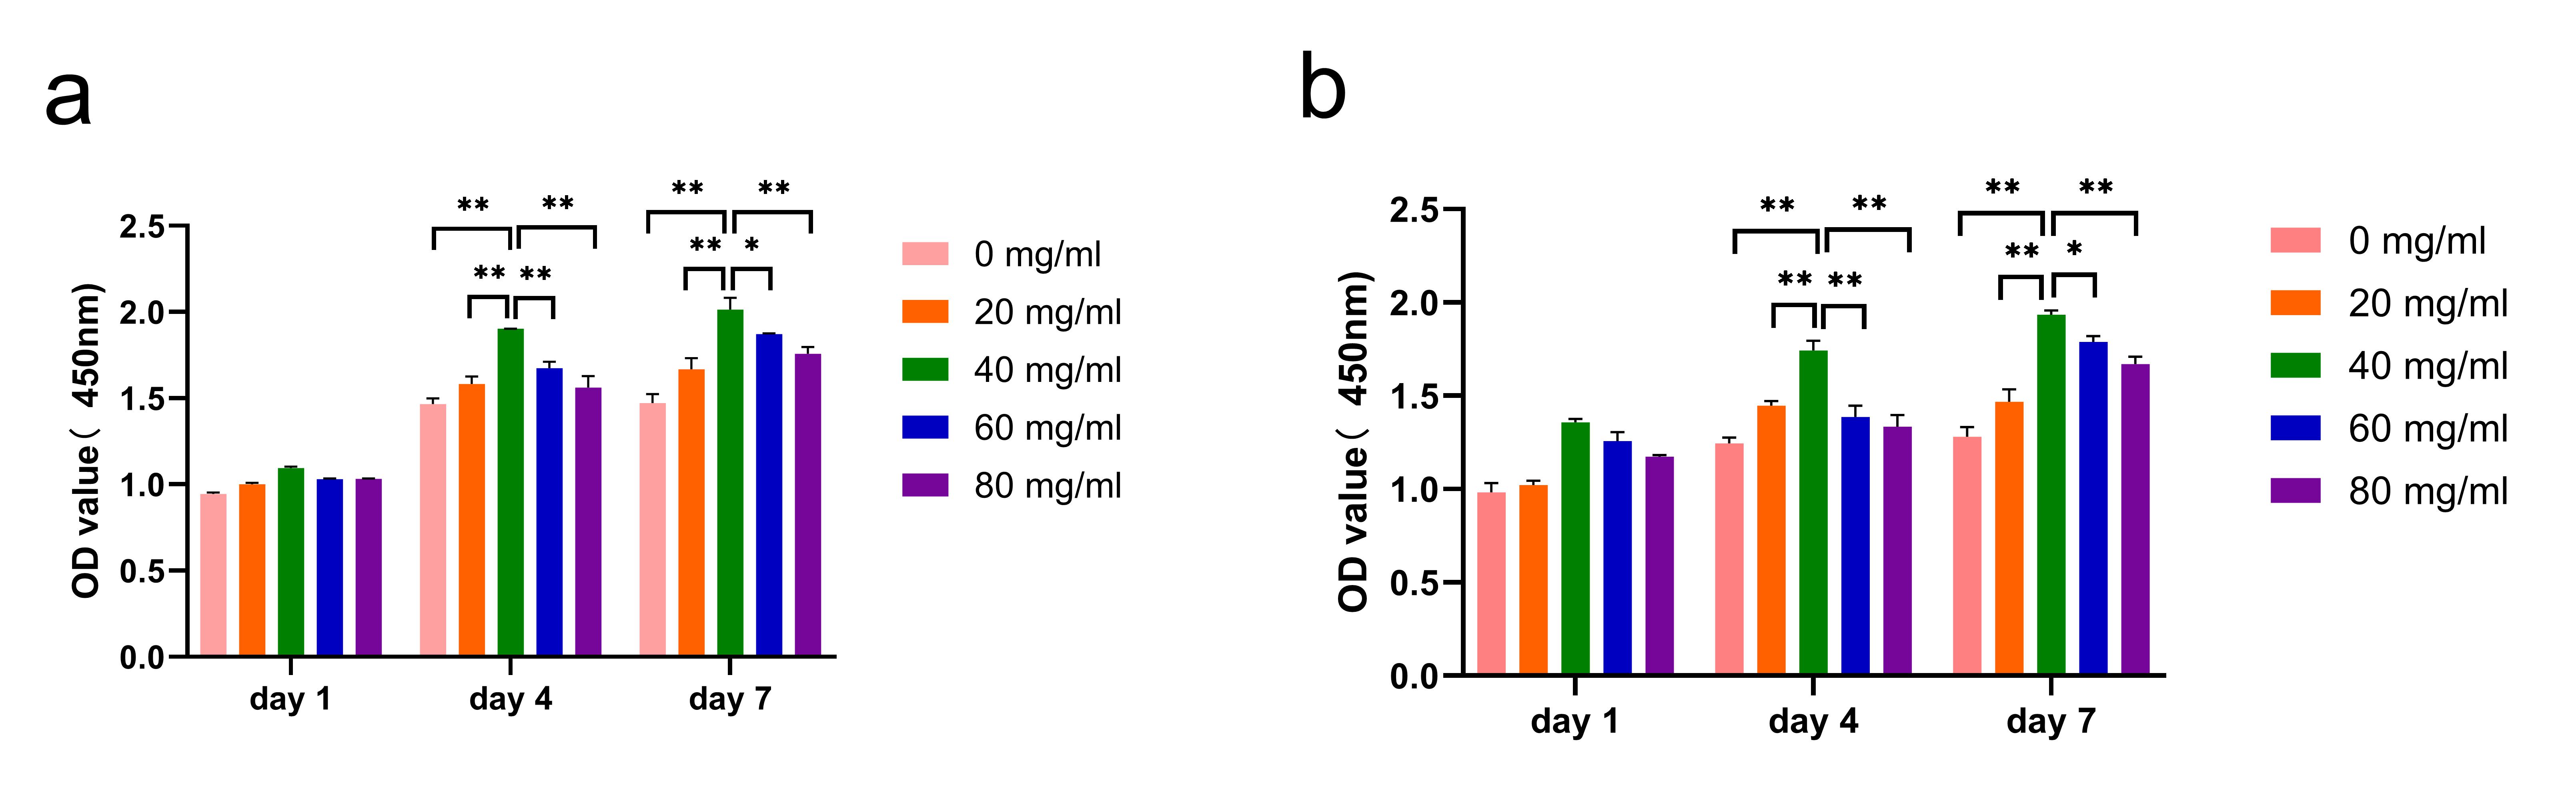


**Figure s1.** cytotoxicity of different concentration of MT@PLGA NPs contained in scaffolds towards (a) MC3T3-E1 cells and (b) bEnd.3 cells *in vitro.* n=3; *p < 0.05, **p < 0.01*.*


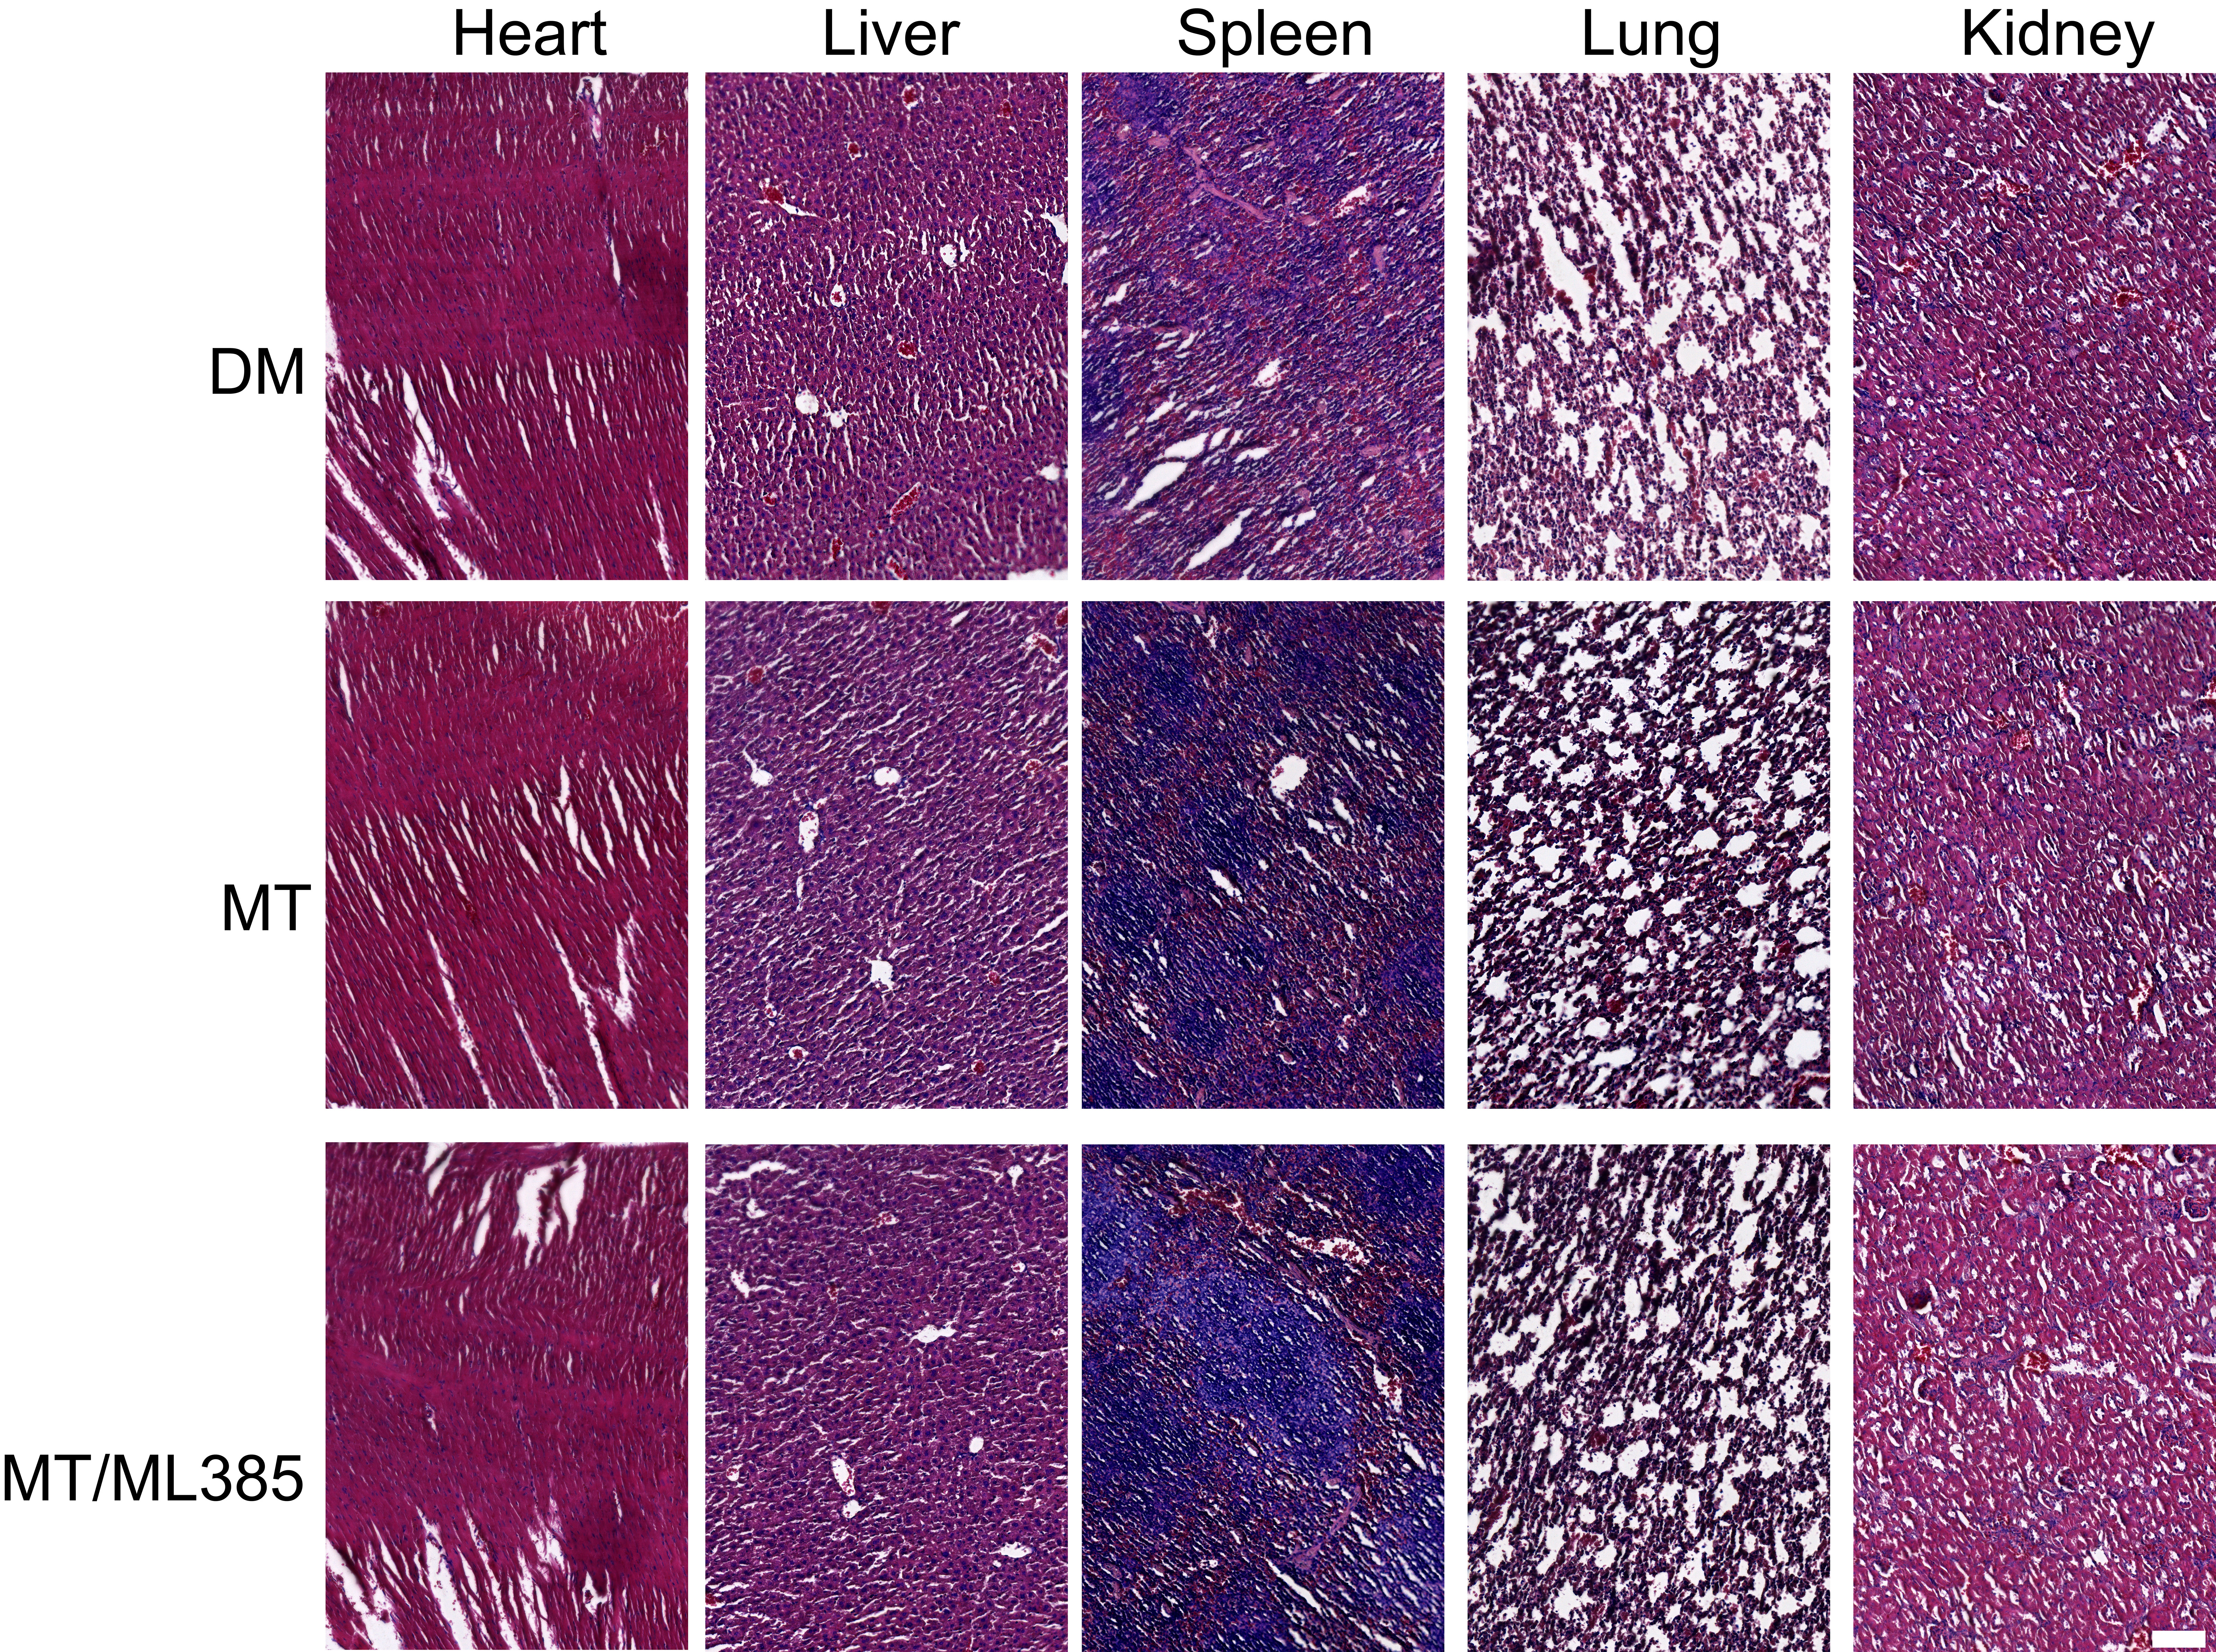


**Figure s2.** Evaluation of the safety profile *in vivo*. Hematoxylin and eosin (H&E) staining was used to determine the presence of injury in the heart, liver, spleen, lung and kidney after implantation of MT nanocomposite scaffold and injection of ML385. Scale bar: 100 µm.

**Table s1. Primer sequences used in RT-qPCR**

| Gene | Forward primer sequence (5’-3’) | Reverse primer sequence (3’-5’) |
| --- | --- | --- |
| Col1a1 | GCTCAGAGGCGAAGGCAACAG | GATGGGCAGGCGGGAGGTC |
| OPN | TGACGATGATGATGACGATGGAGAC | TGTAGGGACGATTGGAGTGAAAGTG |
| BMP-2 | GCCAAACACAAACAGCGGAAGC | GGTGCCACGATCCAGTCATTCC |
| OSX | TACGGCAAGGCTTCGCATCTG | AGCAGGCAGGTGAACTTCTTCTC |
| Runx2 | TCCCAGGCAGGCACAGTCTTC | AGCGGCGTGGTGGAGTGG |
| ALP | CACGGCGTCCATGAGCAGAAC | CAGGCACAGTGGTCAAGGTTGG |
| CD31 | TAGCAAGAAGCAGGAAGGACAGTAC | CCAATGACAACCACCGCAATGAG |
| Ang1 | TTCGTGCTGGGTCTGGTTGTG | TTGGCGTCATGGTGCTGAGTC |
| Ang2 | TCACTTCCAGGTCACCACTTGC | GGACAGGCCAGCCATTCTCAC |
| VEGF | CCACGACAGAAGGAGAGCAGAAG | GGTCTCAATCGGACGGCAGTAG |
| CAT | GGAGGCGGGAACCCAATAGGAG | TGTCAAAGTGTGCCATCTCGTCAG |
| SOD2 | TCCCAGACCTGCCTTACGACTATG | CTCCTCGGTGGCGTTGAGATTG |
| Nrf2 | CAACCCGAAGCACGCTGAAGG | GGACGCTCGGCTGGGACTC |
| FGFr3 | GGTGGTCATGGCAGAAGCTATTGG | CAGGTCCTTGTCAGTCGCATCATC |
| HO-1 | ACCGCCTTCCTGCTCAACATTG | CCTCTGACGAAGTGACGCCATC |
| SOD3 | TTCTTGTTCTACGGCTTGCTACTGG | CGTGTCGCCTATCTTCTCAACCAG |
| Wnt11 | AACTACCTGCTTGACCTGGAGAGAG | GGCGATGGTGTGACTGATGGTG |
| Col9a1 | GAGCCAGGAAGACAAGGACACA | CCAACTATGCCAGTGATGCCTCTC |
| Keap1 | TGGTCGCCCTGTGCCTCTATG | ATGCCACTCGTCCCGCTCTG |
| GADPH | GCGGG CGCTG GAGGA GAA | GGATC TTCAT GAGGT AGTCA GTC |
